# Supplementary material for: Improving molecular property prediction through a task similarity enhanced transfer learning strategy
Source: PubMed Central journal article supplement (PMC9579493; doi:10.1016/j.isci.2022.105231), 2022-09-30
Supplement: mmc1.pdf [file mmc1.pdf]

iScience, Volume 25

## **Supplemental information**

### **Improving molecular property prediction through a task similarity enhanced transfer learning strategy**

**Han Li, Xinyi Zhao, Shuya Li, Fangping Wan, Dan Zhao, and Jianyang Zeng**

## 1 S1 Supplementary Notes

### 2 S1.1 Effect of the number of selected source tasks

3 To assess the effect of the number of selected source tasks (denoted by  $n$ ) on our proposed transfer  
4 learning strategy, we plotted the prediction performance versus different values of  $n$  in Figure S9. We  
5 found that the prediction performance gradually improved with the increase of the value of  $n$  until the best  
6 performance that MoTSE can achieve (denoted by MoTSE\*) was reached. To balance the accuracy and  
7 efficiency, we set  $n$  to three and five for the QM9 and PCBA datasets, respectively. We also introduced  
8 a baseline method that randomly selected source tasks for target tasks (denoted by Random) to make  
9 comparison with our proposed transfer learning strategy which exploited MoTSE to guide the source task  
10 selection.

### 11 S1.2 Effect of the Value of $\lambda$

12 We use  $\lambda$  to adjust the weights of the extracted local and global knowledge in the similarity estimation  
13 process. To evaluate the influence of the value of  $\lambda$  on the model performance, we plotted the prediction  
14 performance versus different values of  $\lambda$  in Figure S11a. We observed that MoTSE was robust to different  
15 values of  $\lambda$  ranging from 0.3 to 0.7. We set  $\lambda$  to 0.7 in our computational experiments.

### 16 S1.3 Effect of the Randomness of the Probe Dataset

17 The probe dataset is an important part of our MoTSE framework, which is shared across all tasks and  
18 acted as a proxy in the process of projecting each task into the unified latent task space, as described  
19 in the Method section of the main text. To evaluate the effect of different probe datasets, we first ran-  
20 domly sampled three probe datasets from the ZINC dataset and used MoTSE to estimate the similarity  
21 between tasks on the QM9<sub>10k</sub> and PCBA<sub>10k</sub> datasets using the three probe datasets, respectively. Then  
22 we measured the Pearson’s and Spearman’s correlations between the similarity values estimated using  
23 three different probe datasets for individual tasks. The average of Pearson’s and Spearman’s correlations  
24 across all tasks on the QM9 dataset were 0.999 and 0.977, respectively. The average of Pearson’s and  
25 Spearman’s correlations across all tasks on the PCBA dataset were 0.996 and 0.886, respectively. Such  
26 high correlation results indicated that MoTSE was robust to different probe datasets.

### 27 S1.4 Effect of the Size of Probe Dataset

28 We also investigated the effect of the size of the probe dataset on the prediction performance of MoTSE.  
29 We plotted the prediction performance of MoTSE versus different sizes of the probe datasets (see Fig-  
30 ure S11b). From the results, the prediction performance kept relatively stable at high accuracy scores  
31 when the sizes of the probe dataset were larger than 300. We set the size of the probe dataset to 500 in  
32 our computational experiments.

### 33 S1.5 Ablation study

34 As we discussed in the main manuscript, MoTSE employed the attribution and MRSA methods to cap-  
35 ture the local and global knowledge of molecular property prediction method, respectively. We have con-  
36 ducted an ablation study on MoTSE to investigate the effect on the prediction performance if we only used  
37 the attribution method (denoted by MoTSE<sub>local</sub>) or the MRSA method (denoted by MoTSE<sub>global</sub>) for the

38 task similarity estimation. As shown in Figure S10, MoTSE outperformed  $\text{MoTSE}_{local}$  and  $\text{MoTSE}_{glcoal}$   
39 on both QM9 and PCBA datasets, indicating that MoTSE provided more accurate similarity estimations  
40 in comparison with  $\text{MoTSE}_{local}$  and  $\text{MoTSE}_{glcoal}$ . Thus,  $\text{MoTSE}_{local}$  and  $\text{MoTSE}_{glcoal}$  are complementary  
41 to each other, and each of them contributes to the similarity estimation.

## 42 **S1.6 Generalize to multi-to-one transfer learning**

43 MoTSE performs transfer learning in a one-to-one fashion (i.e., transfer one source task to one target  
44 task). We also conducted new tests to evaluate whether a multi-to-one version of MoTSE (denoted  
45 by MTO) could provide better prediction performance. More specifically, for each target task, we first  
46 pre-trained a model by learning to predict the targets provided by its top- $k$  ( $k > 1$ ) similar tasks in a  
47 multitask learning fashion and then finetuned the pre-trained model on the dataset of the target task.  
48 We set  $k$  to 2 and 3, resulting in two variations of MTO, denoted by  $\text{MTO}_{k=2}$  and  $\text{MTO}_{k=3}$ , respectively.  
49 In addition, we also introduced the ideal versions of  $\text{MTO}_{k=2}$  and  $\text{MTO}_{k=3}$ , denoted by  $\text{MTO}_{k=2}^*$  and  
50  $\text{MTO}_{k=3}^*$ , respectively, which always selected the  $k$  tasks that can achieve the best finetuning results as  
51 the source tasks in the pre-training stage. As shown in Figure S12, MoTSE outperformed all the MTO-  
52 based methods on both QM9 and PCBA datasets. Such results may be attributed to that the knowledge  
53 contained in the model pre-trained on multiple tasks was potentially more abstract and entangled which  
54 made the target task hard to take advantage of such knowledge in the finetuning process with very limited  
55 data. How to effectively exploit the related knowledge from multiple source tasks should be an interesting  
56 direction in future studies.

57 **S2 Supplementary Figures and Tables**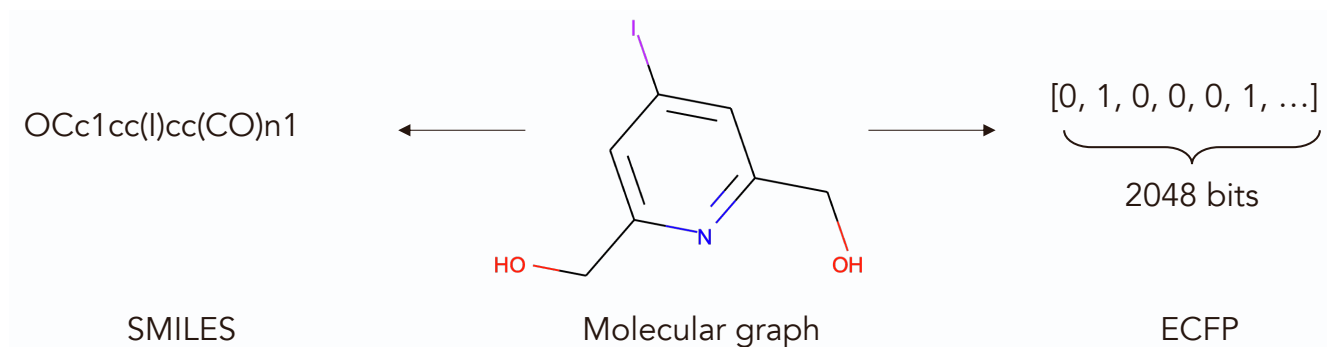

Figure S1: Three types of feature representations of an example molecule, related to Section 2.1 and STAR Methods. ECFP denotes the extended connectivity fingerprints, related to STAR Methods. SMILES denotes the simplified molecular input line entry specification.

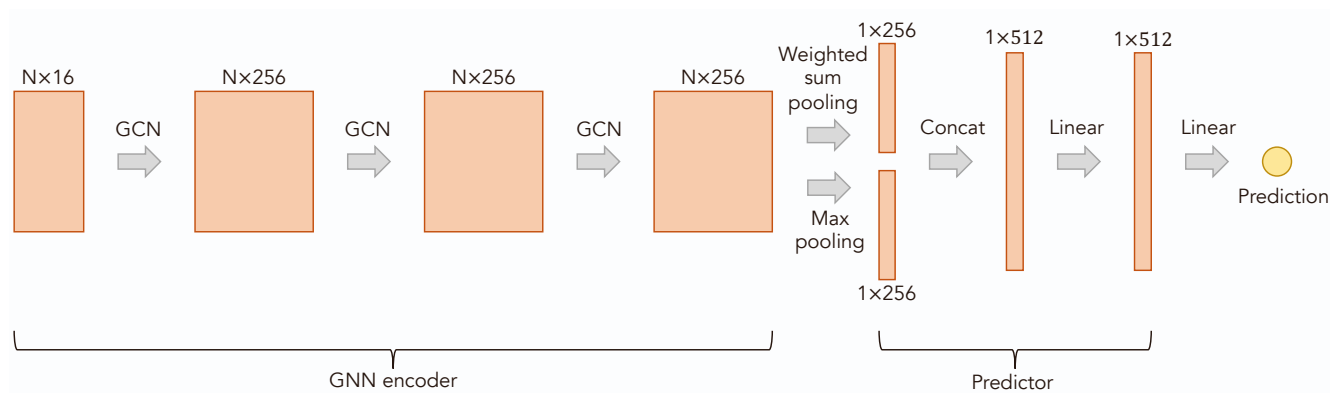

Figure S2: An illustrative diagram of the model architecture employed in our experiments, related to Section 2.1 and STAR Methods.  $N$  stands for the number of nodes in the input graph. The rectangles stand for the feature vectors and the numbers above the them stand for their dimensions. GCN stands for a graph convolutional network layer. Concat stands for the concatenation operation. Linear stands for a linear layer.

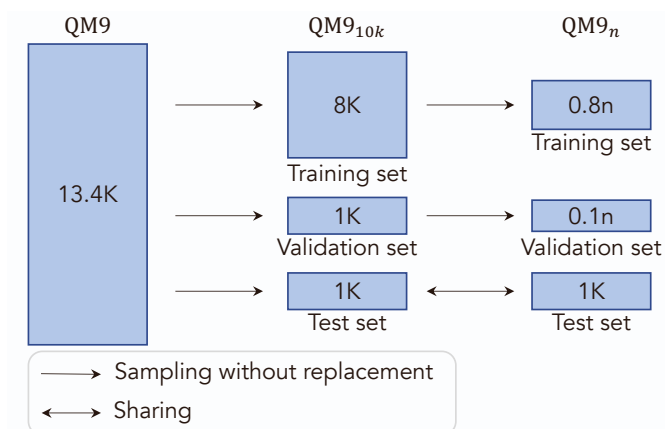

Figure S3: An illustrative diagram of the data generation process, related to Section 2.2. We sample QM9<sub>10k</sub> and QM9<sub>n</sub> from the QM9 dataset, where  $n < 10K$  stands for the size of the dataset. QM9<sub>10k</sub> and QM9<sub>n</sub> share the same test set for a fair comparison of prediction performance.

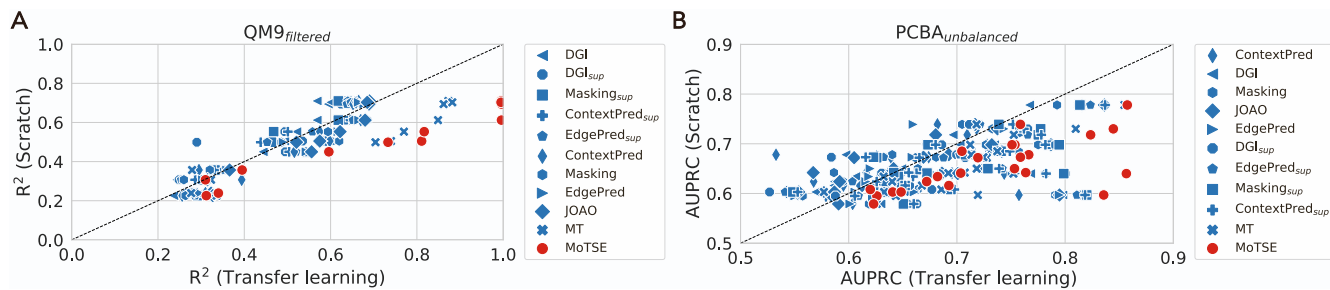

Figure S4: The prediction performance of seven transfer learning methods versus that of the Scratch method on the (A) QM9<sub>filtered</sub> and (B) PCBA<sub>unbalanced</sub> datasets, related to Figure 3.

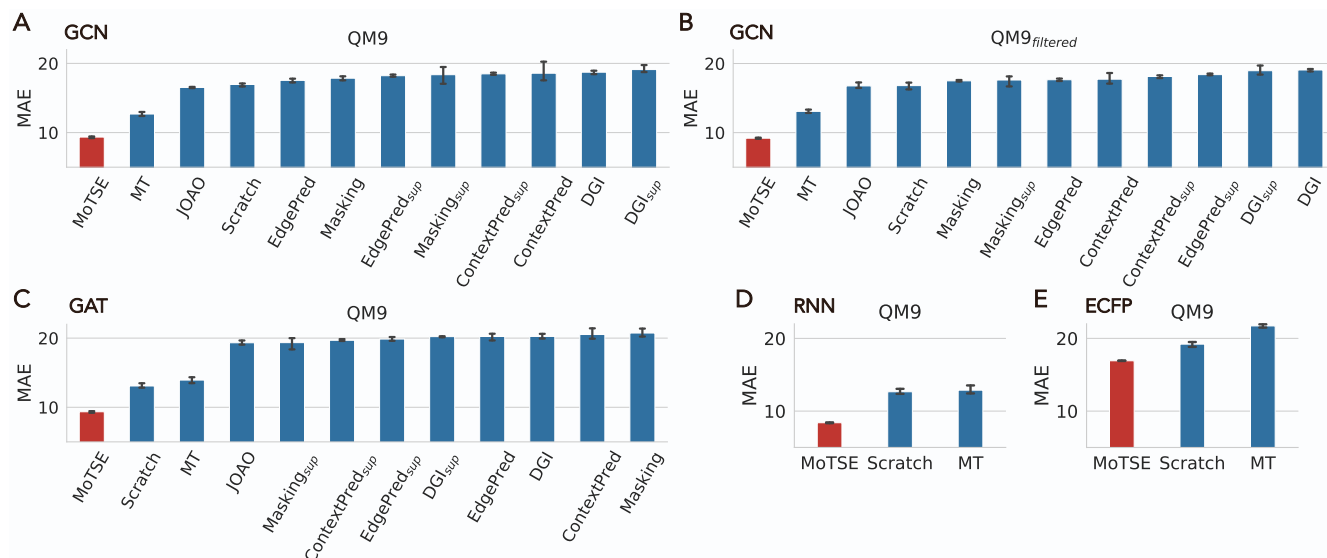

Figure S5: The mean absolute error (MAE) scores of MoTSE and baseline methods on the QM9 dataset, related to Figures 3 and 5. (A) The MAE scores on the QM9 dataset. (B) The MAE scores on the QM9<sub>filtered</sub> dataset. (C-E) The MAE scores of MoTSE equipped with (C) GAT, (D) RNN and (E) ECFP as backbones on the QM9 dataset.



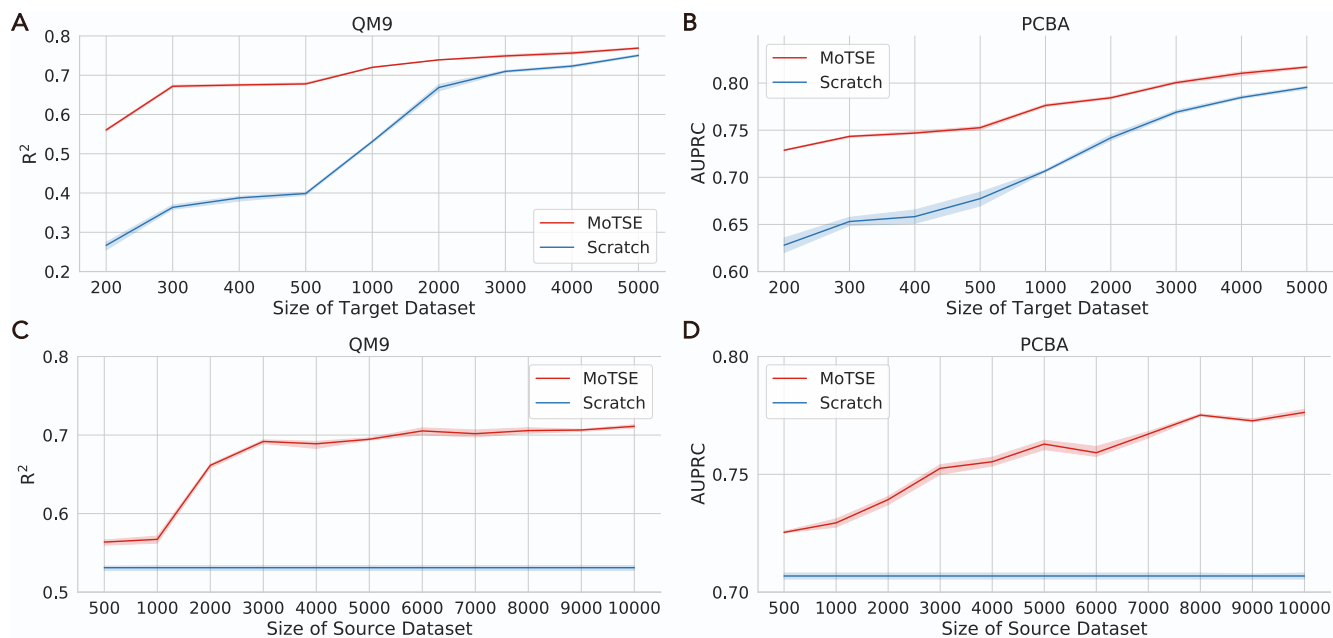

Figure S6: Impact of sizes of (A-B) target and (C-D) source datasets on the prediction performance of MoTSE, related to Section 2.2. The prediction performance of MoTSE and Scratch on (A) QM9 and (B) PCBA datasets, measured in terms of  $R^2$  and AUPRC, given different sizes of target datasets (i.e., 500, 1000, 2000, 3000, 4000, 5000, 6000, 7000, 8000, 9000, 10000). The prediction performance of MoTSE and Scratch on (C) QM9 and (D) PCBA datasets, measured in terms of  $R^2$  and AUPRC, given different sizes of source datasets (i.e., 200, 300, 400, 500, 1000, 2000, 3000, 4000, 5000).

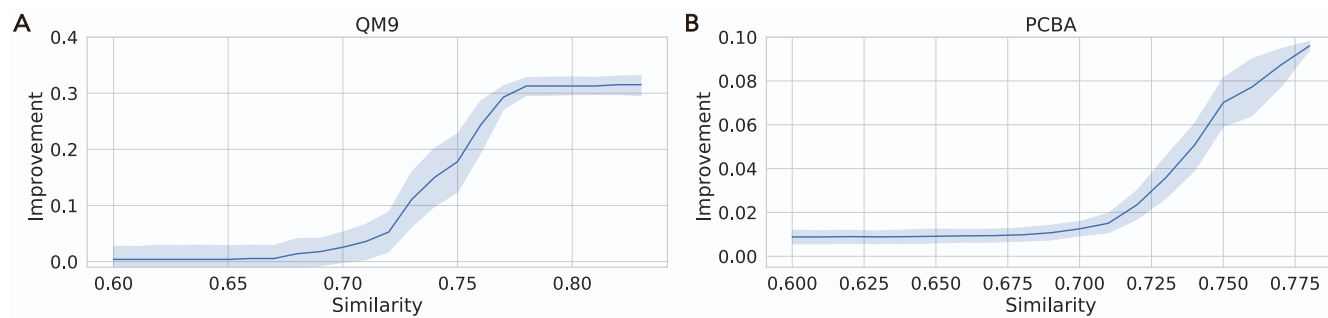

Figure S7: The similarity between the source and target tasks versus the performance improvement on the (A) QM9 and (B) PCBA datasets, related to Section 2.2.

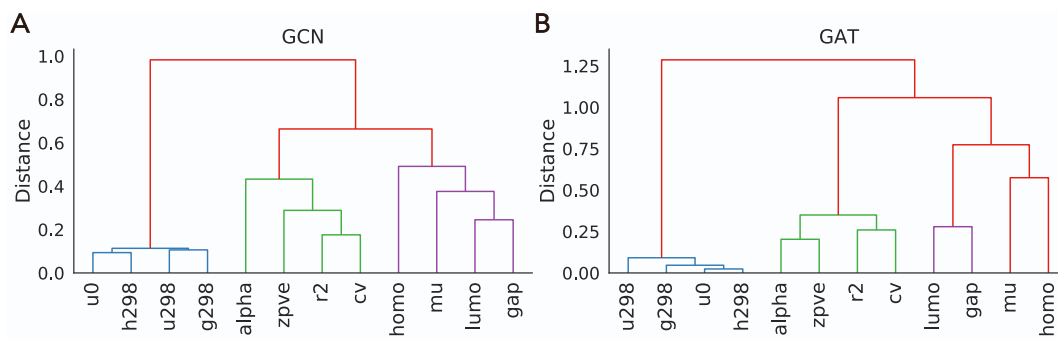

Figure S8: The similarity trees of tasks in the QM9 dataset constructed according to the task similarity estimated based on (A) GCN and (B) GAT, respectively, related to Section 2.3.

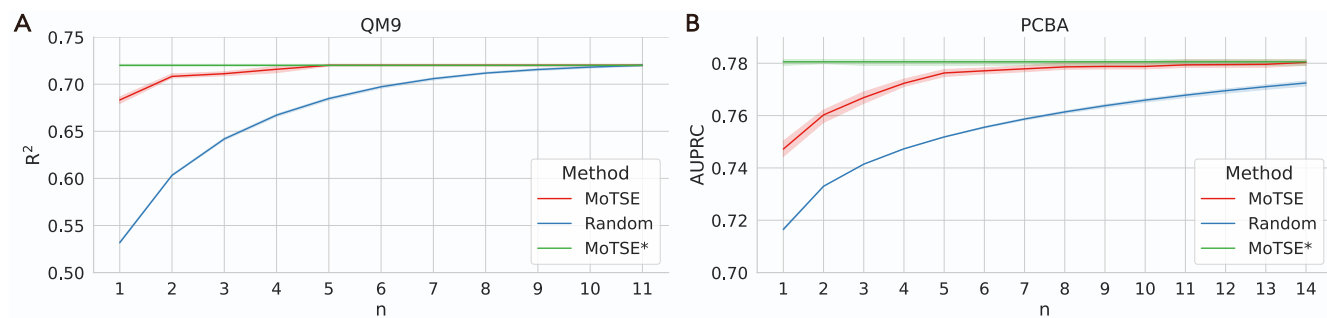

Figure S9: The prediction performance on the QM9 (A) and PCBA (B) datasets, measured in terms of  $R^2$  and AUPRC versus different numbers of the selected source tasks (denoted by  $n$ ), related to Supplementary Notes. Random denotes the results from the randomly selecting source tasks. MoTSE\* denotes the best results that can be achieved by MoTSE.

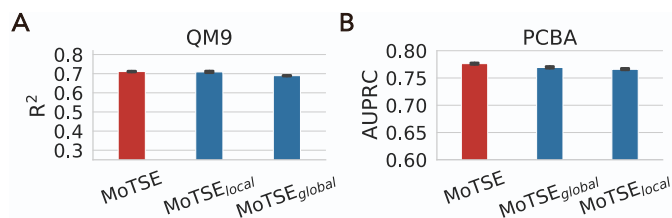

Figure S10: The prediction performance of MoTSE, MoTSE<sub>local</sub> and MoTSE<sub>global</sub> on the (A) QM9 and (B) PCBA datasets, measured in terms of  $R^2$  and AUPRC, respectively, related to Supplementary Notes. MoTSE<sub>local</sub> and MoTSE<sub>global</sub> stand for the variation of MoTSE that only used the attribution method and MRSA method, respectively.

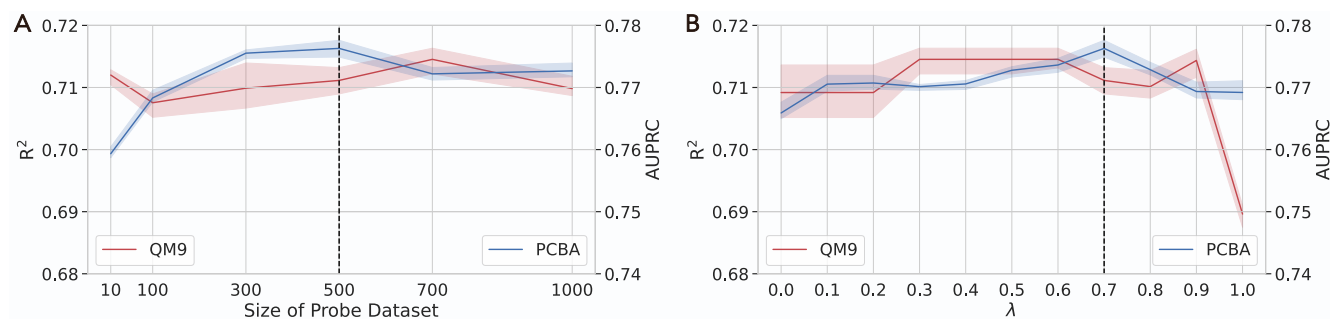

Figure S11: The prediction performance on the QM9 and PCBA datasets, measured in terms of  $R^2$  and AUPRC with different values of  $\lambda$  (A) and different sizes of the probe datasets (B), related to STAR Methods and Supplementary Notes. The dashed line represents the final settings of  $\lambda$  and the size of the probe dataset.

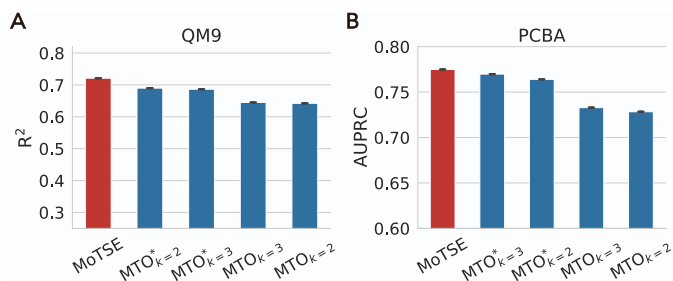

Figure S12: The performance comparisons between MoTSE and different multi-to-one transfer learning versions on the (A) QM9 and (B) PCBA datasets, measured in terms of  $R^2$  and AUPRC, respectively, related to Supplementary Notes. MTO stands for the multi-to-one version of MoTSE, which selects the top- $k$  ( $k > 1$ ) similar tasks according to the similarity derived from MoTSE in the pre-training stage. MTO\* stands for the ideal version of MTO, which always selects the  $k$  tasks that can achieve the best finetuning results as the source tasks.

| Dataset                                        | #Sample                         | Task                | Description                                                             |
|------------------------------------------------|---------------------------------|---------------------|-------------------------------------------------------------------------|
| QM9 <sub>10k</sub><br>/<br>QM9 <sub>1k</sub>   | 10K/1K                          | mu                  | dipole moment                                                           |
|                                                |                                 | alpha               | isotropic polarizability                                                |
|                                                |                                 | homo                | energy of homo                                                          |
|                                                |                                 | lumo                | energy of lumo                                                          |
|                                                |                                 | gap                 | gap between homo and lumo                                               |
|                                                |                                 | r2                  | gap between homo and lumo                                               |
|                                                |                                 | zpve                | zero point vibrational energy                                           |
|                                                |                                 | u0                  | internal energy at 0 K                                                  |
|                                                |                                 | u298                | internal energy at 298.15 K                                             |
|                                                |                                 | h298                | enthalpy at 298.15 K                                                    |
|                                                |                                 | g298                | free energy at 298.15 K                                                 |
|                                                |                                 | cv                  | heat capacity at 298.15 K                                               |
| PCBA <sub>10k</sub><br>/<br>PCBA <sub>1k</sub> | 10K/1K                          | PCBA-1030           | bio-activity against ALDH1A1                                            |
|                                                |                                 | PCBA-1458           | bio-activity against SMN2                                               |
|                                                |                                 | PCBA-1460           | bio-activity against K18                                                |
|                                                |                                 | PCBA-2546           | bio-activity against VP16                                               |
|                                                |                                 | PCBA-2551           | bio-activity against ROR                                                |
|                                                |                                 | PCBA-485297         | bio-activity against Rab9                                               |
|                                                |                                 | PCBA-485313         | bio-activity against NPC1                                               |
|                                                |                                 | PCBA-485364         | bio-activity against TGR                                                |
|                                                |                                 | PCBA-504332         | bio-activity against G9a                                                |
|                                                |                                 | PCBA-504333         | bio-activity against BAZ2B                                              |
|                                                |                                 | PCBA-504339         | bio-activity against JMJD2A                                             |
|                                                |                                 | PCBA-504444         | bio-activity against Nrf2                                               |
|                                                |                                 | PCBA-504467         | bio-activity against ELG1                                               |
|                                                |                                 | PCBA-588342         | bio-activity against luciferase                                         |
|                                                |                                 | PCBA-624296         | bio-activity against DNA re-replication                                 |
|                                                |                                 | PCBA-624297         | bio-activity against DNA re-replication                                 |
|                                                |                                 | PCBA-624417         | bio-activity against GLP-1                                              |
|                                                |                                 | PCBA-651965         | bio-activity against ClpP                                               |
|                                                |                                 | PCBA-652104         | bio-activity against TDP-43                                             |
|                                                |                                 | PCBA-686970         | bio-activity against HT-1080-NT                                         |
| PCBA-686978                                    | bio-activity against DT40-hTDP1 |                     |                                                                         |
| PCBA-686979                                    | bio-activity against DT40-hTDP1 |                     |                                                                         |
| PCBA-720504                                    | bio-activity against Plk1 PBD   |                     |                                                                         |
| HOPV                                           | 350                             | HOMO                | energy of HOMO                                                          |
|                                                |                                 | LUMO                | energy of LUMO                                                          |
|                                                |                                 | electrochemical_gap | minimal energy to create an electron hole pair in a semiconductor       |
|                                                |                                 | optical_gap         | exciton energy which determines onset of vertical interband transitions |
|                                                |                                 | PCE                 | power conversion efficiency                                             |
|                                                |                                 | V_OC                | open-circuit voltage                                                    |
|                                                |                                 | J_SC                | short-circuit current density                                           |
| fill_factor                                    | maximum power from a solar cell |                     |                                                                         |
| BACE                                           | 1513                            | BACE                | inhibitors of human $\beta$ -secretase 1 (BACE-1)                       |
| FreeSolv                                       | 642                             | FreeSolv            | hydration free energy in water                                          |

Table S1: Tasks and descriptions in the preprocessed QM9 and PCBA datasets, HOPV dataset, BACE dataset and FreeSolv dataset, related to Section 2 and STAR Methods. #Sample stands for the number of data samples for each tasks in the dataset.



| Dataset                    | QM9            | QM9 <sub>filtered</sub> | PCBA          | PCBA <sub>unbalanced</sub> | Alchemy        | HOPV           | FreeSolv      | BACE          |
|----------------------------|----------------|-------------------------|---------------|----------------------------|----------------|----------------|---------------|---------------|
| Metric                     | R <sup>2</sup> | R <sup>2</sup>          | AUPRC         | AUPRC                      | R <sup>2</sup> | R <sup>2</sup> | RMSE          | AUPRC         |
| Scratch                    | 0.531 (0.003)  | 0.488 (0.018)           | 0.707 (0.001) | 0.657 (0.004)              | 0.568 (0.009)  | 0.387 (0.063)  | 1.382 (0.023) | 0.893 (0.017) |
| MT                         | 0.654 (0.004)  | 0.624 (0.005)           | 0.769 (0.002) | 0.704 (0.003)              | 0.664 (0.003)  | 0.174 (0.02)   | 1.615 (0.148) | 0.886 (0.010) |
| DGI                        | 0.499 (0.045)  | 0.439 (0.002)           | 0.699 (0.001) | 0.662 (0.004)              | 0.557 (0.006)  | 0.462 (0.006)  | 1.950 (0.034) | 0.827 (0.012) |
| EdgePred                   | 0.539 (0.003)  | 0.517 (0.002)           | 0.717 (0.003) | 0.677 (0.004)              | 0.585 (0.027)  | 0.430 (0.023)  | 1.665 (0.056) | 0.868 (0.013) |
| Masking                    | 0.538 (0.004)  | 0.509 (0.004)           | 0.711 (0.003) | 0.665 (0.002)              | 0.583 (0.002)  | 0.429 (0.028)  | 1.647 (0.061) | 0.836 (0.006) |
| ContextPred                | 0.550 (0.014)  | 0.509 (0.013)           | 0.706 (0.002) | 0.662 (0.001)              | 0.576 (0.027)  | 0.425 (0.012)  | 2.044 (0.057) | 0.867 (0.004) |
| DGI <sub>sup</sub>         | 0.544 (0.008)  | 0.457 (0.006)           | 0.738 (0.002) | 0.691 (0.004)              | 0.528 (0.012)  | 0.347 (0.019)  | 1.752 (0.072) | 0.839 (0.013) |
| EdgePred <sub>sup</sub>    | 0.571 (0.003)  | 0.493 (0.004)           | 0.735 (0.002) | 0.694 (0.004)              | 0.570 (0.003)  | 0.358 (0.059)  | 1.597 (0.092) | 0.822 (0.010) |
| Masking <sub>sup</sub>     | 0.568 (0.008)  | 0.482 (0.013)           | 0.734 (0.006) | 0.696 (0.005)              | 0.570 (0.006)  | 0.430 (0.005)  | 1.616 (0.060) | 0.812 (0.004) |
| ContextPred <sub>sup</sub> | 0.571 (0.001)  | 0.486 (0.002)           | 0.735 (0.001) | 0.699 (0.002)              | 0.570 (0.002)  | 0.421 (0.011)  | 2.053 (0.052) | 0.830 (0.013) |
| MoTSE                      | 0.711 (0.002)  | 0.691 (0.002)           | 0.776 (0.001) | 0.733 (0.001)              | 0.711 (0.002)  | 0.521 (0.029)  | 1.198 (0.042) | 0.916 (0.003) |

Table S2: The prediction performance of MoTSE and baseline methods on the QM9, QM9<sub>filtered</sub>, PCBA, PCBA<sub>filtered</sub>, Alchemy, HOPV, FreeSolv and BACE datasets, related to Figures 3 and 4.

| Dataset |                            | QM9                      | PCBA                     |
|---------|----------------------------|--------------------------|--------------------------|
| Metric  |                            | R <sup>2</sup>           | AUPRC                    |
| Method  | Scratch                    | 0.608 <sub>(0.006)</sub> | 0.683 <sub>(0.001)</sub> |
|         | MT                         | 0.645 <sub>(0.005)</sub> | 0.719 <sub>(0.001)</sub> |
|         | DGI                        | 0.455 <sub>(0.002)</sub> | 0.699 <sub>(0.002)</sub> |
|         | EdgePred                   | 0.469 <sub>(0.005)</sub> | 0.708 <sub>(0.001)</sub> |
|         | Masking                    | 0.443 <sub>(0.016)</sub> | 0.687 <sub>(0.002)</sub> |
|         | ContextPred                | 0.435 <sub>(0.012)</sub> | 0.701 <sub>(0.001)</sub> |
|         | DGI <sub>sup</sub>         | 0.268 <sub>(0.012)</sub> | 0.725 <sub>(0.002)</sub> |
|         | EdgePred <sub>sup</sub>    | 0.400 <sub>(0.010)</sub> | 0.723 <sub>(0.001)</sub> |
|         | Masking <sub>sup</sub>     | 0.423 <sub>(0.020)</sub> | 0.725 <sub>(0.001)</sub> |
|         | ContextPred <sub>sup</sub> | 0.399 <sub>(0.016)</sub> | 0.725 <sub>(0.001)</sub> |
|         | MoTSE                      | 0.711 <sub>(0.002)</sub> | 0.751 <sub>(0.0)</sub>   |

Table S3: The prediction performance of MoTSE and baseline methods equipped with graph attention network (GAT) on the QM9 and PCBA datasets, related to Figure 5A.

| Dataset |         | QM9                      | PCBA                     |
|---------|---------|--------------------------|--------------------------|
| Metric  |         | R <sup>2</sup>           | AUPRC                    |
| Method  | Scratch | 0.543 <sub>(0.003)</sub> | 0.733 <sub>(0.001)</sub> |
|         | MT      | 0.369 <sub>(0.010)</sub> | 0.763 <sub>(0.001)</sub> |
|         | MoTSE   | 0.639 <sub>(0.000)</sub> | 0.782 <sub>(0.000)</sub> |

Table S4: The prediction performance of MoTSE and baseline methods equipped with fully-connected network (FCN) on the QM9 and PCBA datasets, related to Figure 5B.

| Dataset |         | QM9                      | PCBA                     |
|---------|---------|--------------------------|--------------------------|
| Metric  |         | R <sup>2</sup>           | AUPRC                    |
| Method  | Scratch | 0.751 <sub>(0.003)</sub> | 0.665 <sub>(0.005)</sub> |
|         | MT      | 0.758 <sub>(0.003)</sub> | 0.707 <sub>(0.004)</sub> |
|         | MoTSE   | 0.815 <sub>(0.001)</sub> | 0.735 <sub>(0.001)</sub> |

Table S5: The prediction performance of MoTSE and baseline methods equipped with recurrent neural network (RNN) on the QM9 and PCBA datasets, related to Figure 5C.
